# Supplementary material
Source: PubMed Central journal article supplement (PMC5396575)
Supplement: NIHMS858359-supplement-1.pdf [file NIHMS858359-supplement-1.pdf]

**Cell Reports, Volume 18**

**Supplemental Information**

**Coupling between Protein Stability and Catalytic  
Activity Determines Pathogenicity of G6PD Variants**

**Anna D. Cunningham, Alexandre Colavin, Kerwyn Casey Huang, and Daria Mochly-Rosen**

## Supplemental Figures and Tables

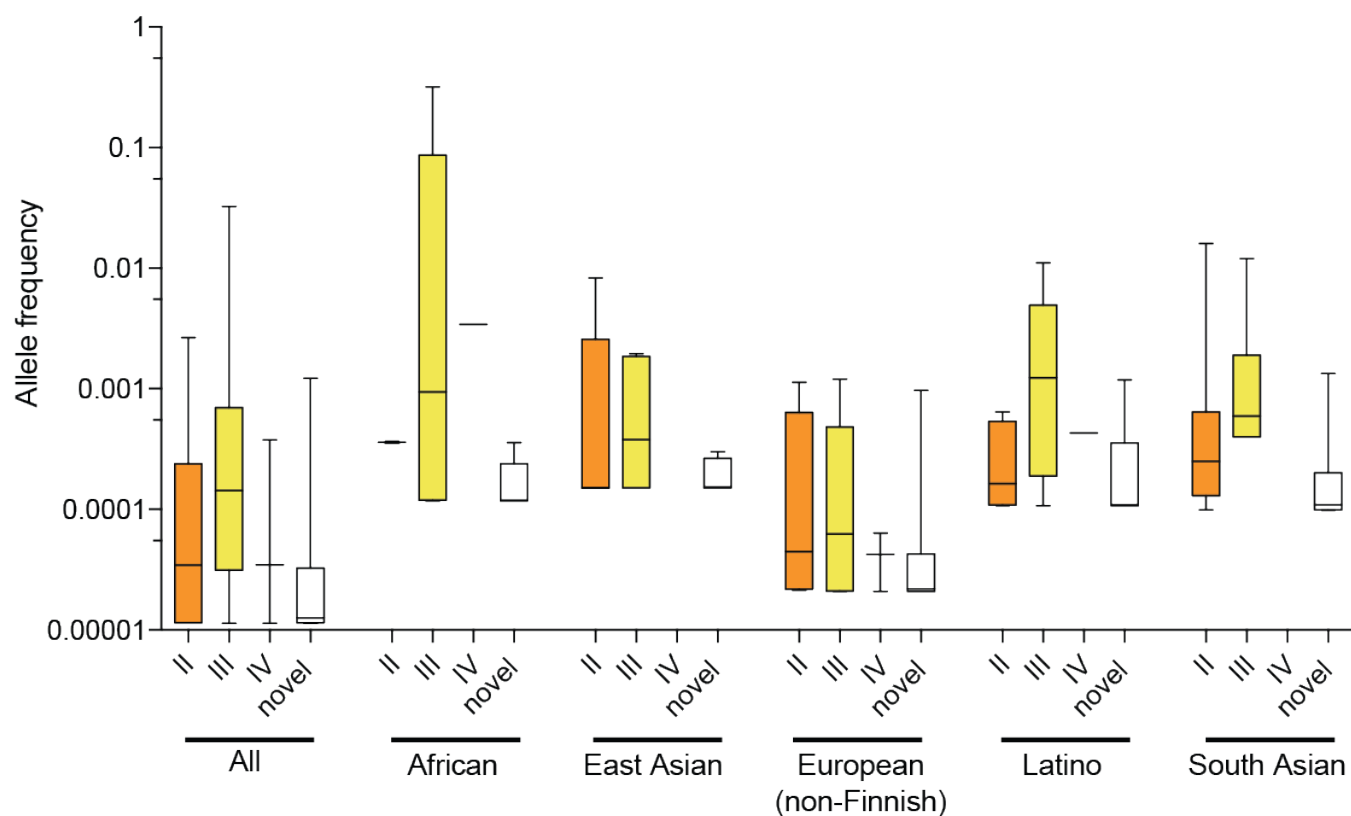

**Figure S1: Allele frequencies of previously known and uncharacterized G6PD variants in the ExAC database. Related to Figure 2.** Allele frequencies of G6PD variants in each population (Tables S1, S2) are plotted, separated by class. The Finnish population is omitted due to the low number of variants observed in this population.

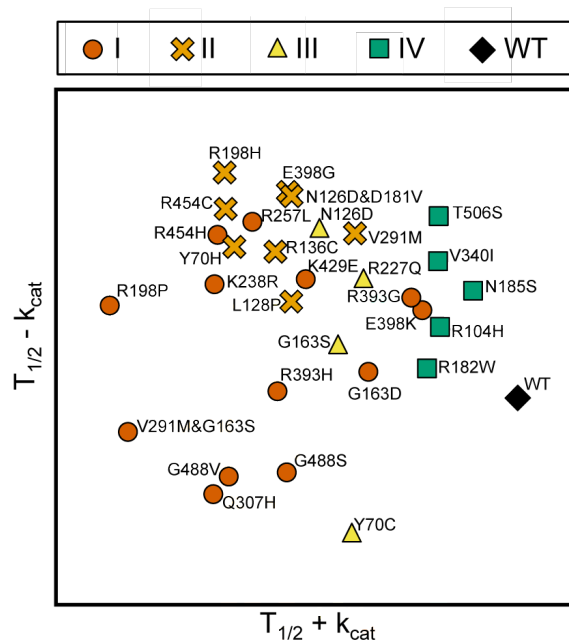

**Figure S2: Labeled PCA-like plot. Related to Figure 4.** PCA-like plot of variants from this study and other studies, labeled corresponding to each variant (data are the same as in Fig. 4A).

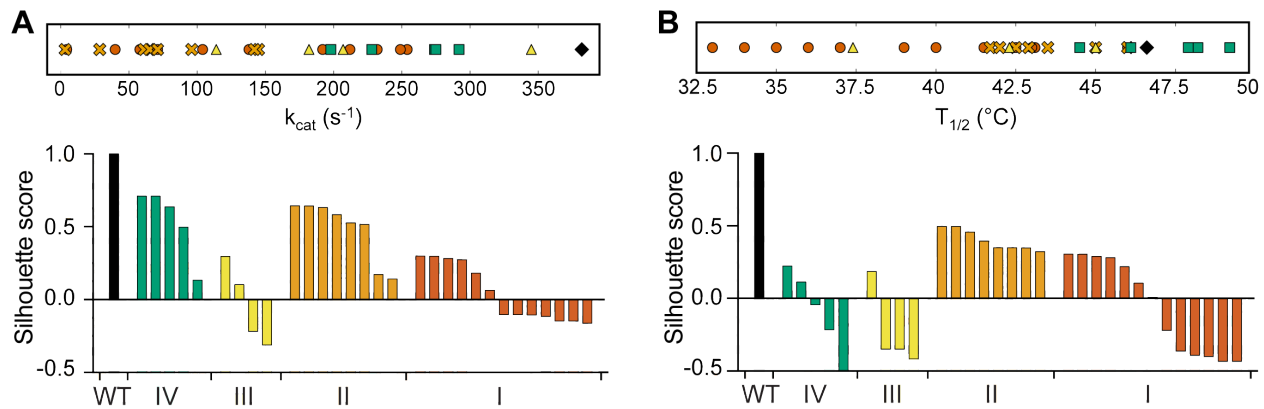

**Figure S3: Separation of G6PD variants along individual biochemical parameters. Related to Figure 4.**

- A)**  $k_{cat}$  values of variants from this study and other studies (top) and silhouette scores resulting from clustering (bottom).
- B)**  $T_{1/2}$  values of variants from this study and other studies (top) and silhouette scores resulting from clustering (bottom).

**Table S1: Uncharacterized G6PD variants in the ExAC database. Related to Figure 2.** Variants characterized in this study are highlighted in yellow.

*See separate Excel file.*

**Table S2: Previously identified G6PD variants in the ExAC database. Related to Figure 2.**

*See separate Excel file.*

**Table S3: Biochemical parameters of G6PD variants in this study. *h* is the fitted Hill coefficient.** Related to Figure 3A.

| Variant | Class | SIFT | PolyPhen2 | $K_M$ NADP <sup>+</sup><br>( $\mu$ M) | <i>h</i> NADP <sup>+</sup> | $K_M$ G6P<br>( $\mu$ M) | <i>h</i> G6P | $k_{cat}$ (s <sup>-1</sup> ) | $T_{1/2}$ (°C) |
|---------|-------|------|-----------|---------------------------------------|----------------------------|-------------------------|--------------|------------------------------|----------------|
| WT      | --    | --   | --        | 16.3 ± 0.6                            | 2.3                        | 106 ± 4                 | 1.6          | 382 ± 8                      | 46.6 ± 0.1     |
| Y70H    | II    | 0    | 0.999     | 34 ± 4                                | 2.2                        | 143 ± 18                | 1            | 61 ± 5                       | 41.7 ± 0.2     |
| Y70C    | III   | 0    | 1         | 21 ± 2                                | 2.5                        | 92 ± 5                  | 3            | 345 ± 12                     | 37.4 ± 0.3     |
| R198P   | I     | 0    | 1         | 38 ± 2                                | 1.5                        | 26 ± 4                  | 1            | 4.4 ± 0.2                    | 36.0 ± 0.2     |
| R198H   | II    | 0    | 1         | 48 ± 3                                | 1.5                        | 81 ± 19                 | 0.7          | 3.2 ± 0.2                    | 43.5 ± 0.2     |
| Q307H   | I     | 0    | 1         | 14.7 ± 0.6                            | 2.3                        | 83 ± 3                  | 2.3          | 212 ± 5                      | 34.0 ± 0.2     |
| Q307P   | III   | 0    | 1         | --                                    | --                         | --                      | --           | --                           | --             |
| E398K   | I     | 0    | 1         | 16.3 ± 0.3                            | 2.7                        | 78 ± 3                  | 2.8          | 249 ± 7                      | 46.0 ± 0.2     |
| E398G   | II    | 0    | 1         | 11 ± 1                                | 1.7                        | 47 ± 5                  | 1.6          | 65 ± 4                       | 45.0 ± 0.1     |
| R104H   | --    | 0.62 | 0.106     | 16.1 ± 0.5                            | 3.9                        | 98 ± 4                  | 1.5          | 274 ± 6                      | 46.1 ± 0.1     |
| R182W   | --    | 0    | 0.437     | 20 ± 1                                | 2                          | 145 ± 10                | 1            | 292 ± 9                      | 44.5 ± 0.1     |
| N185S   | --    | 0.91 | 0         | 17 ± 1                                | 3.3                        | 94 ± 7                  | 1            | 275 ± 10                     | 48.2 ± 0.1     |
| V340I   | --    | 0.66 | 0.047     | 20 ± 1                                | 2.7                        | 119 ± 12                | 1            | 228 ± 9                      | 47.9 ± 0.1     |
| T506S   | --    | 0.74 | 0.008     | 18.9 ± 0.9                            | 2.8                        | 107 ± 12                | 1            | 198 ± 8                      | 49.2 ± 0.1     |

**Table S4: Biochemical parameters of G6PD variants from other studies that are used in this study.** Related to Figure 4.

| <b>Variant</b>           | <b>Class</b> | <b><math>K_M</math> NADP<sup>+</sup> (<math>\mu</math>M)</b> | <b><math>K_M</math> G6P (<math>\mu</math>M)</b> | <b><math>k_{cat}</math> (<math>s^{-1}</math>)</b> | <b><math>T_{1/2}</math> (<math>^{\circ}</math>C)</b> | <b>Reference</b>           |
|--------------------------|--------------|--------------------------------------------------------------|-------------------------------------------------|---------------------------------------------------|------------------------------------------------------|----------------------------|
| <b>K429E</b>             | I            | 6.4                                                          | 39.9                                            | 138                                               | 43.1                                                 | (Gómez-Manzo et al., 2014) |
| <b>R136C</b>             | II           | 3.6                                                          | 21.5                                            | 96                                                | 42.9                                                 | (Gómez-Manzo et al., 2014) |
| <b>R227Q</b>             | III          | 9.1                                                          | 24.9                                            | 182                                               | 45                                                   | (Gómez-Manzo et al., 2014) |
| <b>R393H</b>             | I            | 31.2                                                         | 90.6                                            | 119                                               | 44.3                                                 | (Gómez-Manzo et al., 2014) |
| <b>K238R</b>             | I            | 6.96                                                         | 24.77                                           | 71                                                | 40                                                   | (Gómez-Manzo et al., 2015) |
| <b>N126D &amp; D181V</b> | II           | 9.06                                                         | 15.35                                           | 71                                                | 45                                                   | (Gómez-Manzo et al., 2015) |
| <b>N126D</b>             | III          | 12.97                                                        | 56.44                                           | 114                                               | 45                                                   | (Gómez-Manzo et al., 2015) |
| <b>R393G</b>             | I            | 9.31                                                         | 67.1                                            | 232                                               | 46                                                   | (Wang and Engel, 2009)     |
| <b>R393H</b>             | I            | 16.5                                                         | 190                                             | 192                                               | 39                                                   | (Wang and Engel, 2009)     |
| <b>G488V</b>             | I            | 10.7                                                         | 53.8                                            | 212                                               | 35                                                   | (Wang and Engel, 2009)     |
| <b>G488S</b>             | I            | 11.8                                                         | 49.1                                            | 254                                               | 37                                                   | (Wang and Engel, 2009)     |
| <b>R454C</b>             | II           | 2.76                                                         | 9.53                                            | 28.6                                              | 42.5                                                 | (Wang et al., 2005)        |
| <b>R454H</b>             | I            | 2.38                                                         | 9.71                                            | 39.9                                              | 41.5                                                 | (Wang et al., 2005)        |
| <b>G163D</b>             | I            | 4.8                                                          | 44.4                                            | 249                                               | 42.5                                                 | (Huang et al., 2008)       |
| <b>G163S</b>             | III          | 6.46                                                         | 50.7                                            | 207                                               | 42.3                                                 | (Huang et al., 2008)       |
| <b>R257L</b>             | I            | 24                                                           | 111                                             | 58                                                | 43                                                   | (Gómez-Manzo et al., 2016) |
| <b>V291M</b>             | II           | 17                                                           | 42                                              | 145                                               | 46                                                   | (Gómez-Manzo et al., 2016) |
| <b>L128P</b>             | II           | 18                                                           | 34                                              | 142                                               | 42                                                   | (Gómez-Manzo et al., 2016) |
| <b>V291M</b>             | II           | 34.1                                                         | 56.3                                            | 116                                               | 38                                                   | (Boonyuen et al., 2016)    |
| <b>V291M &amp; G163S</b> | I            | 55.9                                                         | 54.3                                            | 104                                               | 33                                                   | (Boonyuen et al., 2016)    |



## Supplemental Experimental Procedures

### *Cloning and mutagenesis of plasmid constructs*

Wild-type G6PD cDNA was inserted into the pET-28a vector with a 6xHis tag linked by a thrombin cleavage site, using NdeI and Sall restriction sites. Mutagenesis to obtain G6PD variants was performed by the GenScript USA Inc (Piscataway, NJ) mutagenesis service.

### *Enzyme purification*

Proteins were expressed in *E. coli* C43(DE3). Bacteria were grown at 37 °C until  $OD_{600} = 0.4-0.5$ , then expression was induced with 0.5 M IPTG for 4 h. Bacterial pellets were suspended in lysis buffer (50 mM Tris, 300 mM NaCl, 5% glycerol, 0.4 mM PMSF, 1 mg/mL lysozyme, 0.1% Triton X-100, protease inhibitor cocktail (Sigma, St Louis, MO), pH 7.8) and lysed by sonication. Lysate was clarified by spinning at 30,000g for 30 min, and supernatant was loaded onto 1 mL TALON Superflow beads (GE Healthcare, Pittsburgh, PA) for 1 h at 4 °C with rocking. Beads were washed with 30 mL wash buffer (50 mM Tris, 300 mM NaCl, 20 mM imidazole, pH 7.8) and resuspended in 2 mL PBS. 50 Units thrombin (R-BioPharm, Darmstadt, Germany) were added and beads were incubated overnight at 4 °C with rocking. The eluate was then purified on Superdex 75 gel filtration column (GE Healthcare) in buffer: 50 mM Tris, 150 mM NaCl, 0.5 mM EDTA, pH 7.4. Fractions containing G6PD were concentrated using a Vivaspin-6 30 kD MWCO spin column (GE Healthcare) and stored in 40% glycerol, 1 mM EDTA, 1 mM DTT at -80 °C. Protein concentration was measured using the Protein Assay Dye Reagent (Bio-Rad, Hercules, CA).

### *Enzyme activity and stability measurements*

Enzyme activity was determined following the WHO protocol (Organization, 1989), using 0.1–0.5 µg/mL G6PD and 100 mM Tris, 0.5 mM EDTA, 10 mM MgCl<sub>2</sub>, pH 8.0, and varying concentrations of G6P (Sigma) and NADP<sup>+</sup> (98% pure, Sigma).

For  $K_M$  and  $k_{cat}$  measurements, G6P concentration was kept constant at 500 µM while NADP<sup>+</sup> was varied from 1 to 200 µM, or NADP<sup>+</sup> concentration was kept constant at 200 µM while G6P was varied from 5 µM to 1 mM. Production of NADPH was determined by measuring fluorescence on a Flexstation II microplate reader (Molecular Devices Corporation, Sunnyvale, CA) using the NADPH-diaphorase-resazurin coupled reaction (Zhu et al., 2009). Relative Fluorescence Unit (RFU) values were then converted to NADPH concentration using a standard NADPH curve (NADPH 97% pure, Sigma).

For  $T_{1/2}$  measurements, 2 µg/mL enzyme was incubated with 5 µM NADP<sup>+</sup> for 20 min at temperatures ranging from 25 °C to 65 °C, then placed on ice for 5 min. Activity was then assayed by measuring NADPH via absorbance at 340 nm on a Bio-Rad Benchmark Plus microplate reader (Bio-Rad Laboratories, Inc., Hercules, CA).

Data were analyzed using GraphPad Prism v. 6.0a (GraphPad Software, La Jolla, California USA). To obtain kinetic parameters, the data were fitted using the preset nonlinear regression equations *Michaelis-Menten* and *Allosteric sigmoidal*. The best fit was selected using the *Compare* feature, and the following parameters were reported:  $k_{cat}$ ,  $K_M$ , and  $h$  (Hill coefficient, equal to 1 when *Michaelis-Menten* was the best fit). For  $T_{1/2}$ , the data were fit using the *Boltzmann sigmoidal* equation and the *Top* and *Bottom* values were set to 0 and 100, respectively. All values are reported as mean ± standard error.

Interestingly, we found that WT G6PD exhibited allosteric sigmoidal kinetics rather than Michaelis-Menten kinetics, which could be explained by the presence of multiple independent active sites in dimeric or tetrameric G6PD (Sweeny and Fisher, 1968). Furthermore, G6PD contains two binding sites for NADP<sup>+</sup> per monomer, so allosteric sigmoidal kinetics may be explained by binding cooperativity between these two sites.

## **Supplemental References**

Organization, W.H. (1989). Glucose-6-phosphate dehydrogenase deficiency. WHO Working Group. Bulletin of the World Health Organization 67, 601-611.

Sweeny, J.R., and Fisher, J.R. (1968). Alternative to allosterism and cooperativity in the interpretation of enzyme kinetic data. Biochemistry 7, 561-565.

Zhu, A., Romero, R., and Petty, H.R. (2009). An enzymatic fluorimetric assay for glucose-6-phosphate: application in an in vitro Warburg-like effect. Analytical biochemistry 388, 97-101.
